# Supplementary material for: Mechanism of methanol steam reforming with inverse ZrO 2 /Cu catalyst
Source: Royal Society of Chemistry journal article supplement (doi:10.1039/d5ra07097j), 2025-01-01
Supplement: d5ra07097j1.pdf [file d5ra07097j1.pdf]

## Mechanism of methanol steam reforming with inverse ZrO<sub>2</sub>/Cu catalyst

Jie Feng,<sup>a,#</sup> Tingting Zhang,<sup>c,#</sup> Guozhi Zhao,<sup>b</sup> Chengxiang Li,<sup>b</sup> Xuan Wu,<sup>b</sup> Jiaqiang  
Sun,<sup>b</sup> Yu Wang,<sup>d,\*</sup> Kun Liu,<sup>e,\*</sup> Guofeng Zhao<sup>a,b,\*</sup>

<sup>a</sup>Shanghai Key Laboratory of Green Chemistry and Chemical Processes, School  
of Chemistry and Molecular Engineering, East China Normal University, Shanghai  
200062, China

<sup>b</sup>Anhui Basic Discipline Research Center for Clean Energy and Catalysis, College of  
Chemistry and Materials Science, Anhui Normal University, Wuhu 241002, China

<sup>c</sup>School of foreign languages, Shandong First Medical University & Shandong  
Academy of Medical Sciences, Taian 271016, China

<sup>d</sup>Frontiers Science Center for Transformative Molecules, Zhangjiang Insititute for  
Advanced Study, Shanghai Jiao Tong University, Shanghai 200240, China

<sup>e</sup>Institute of Optical Functional Materials for Biomedical Imaging, School of  
Chemistry and Pharmaceutical Engineering, Shandong First Medical University &  
Shandong Academy of Medical Sciences, Taian 271016, China

<sup>#</sup>The authors contribute equally to this work

<sup>\*</sup>Corresponding authors. E-mail addresses: wangyusjtu@sjtu.edu.cn (Yu Wang);

liukun2436@126.com (Kun Liu); gfzhao@ahnu.edu.cn (Guofeng Zhao)

## **Experimental section**

### ***Catalyst preparation***

In the experiment,  $\text{Zr}(\text{NO}_3)_4 \cdot 5\text{H}_2\text{O}$  (analytical grade, AR) was obtained from Macklin company (China),  $\text{Cu}(\text{NO}_3)_2 \cdot 3\text{H}_2\text{O}$  (analytical grade, AR) and anhydrous oxalic acid (analytical grade, AR) were purchased from Aladdin company (China). Anhydrous ethanol (analytical grade, AR) was obtained from Shanghai Chemical Reagent Company (China).

The inverse  $\text{ZrO}_2\text{-}x/\text{Cu}$  ( $x$  is weight content of  $\text{ZrO}_2$ ) catalyst was prepared using the oxalate sol-gel method. Take  $\text{ZrO}_2\text{-}0.25/\text{Cu}$  for example, 0.87 g of  $\text{Zr}(\text{NO}_3)_4 \cdot 5\text{H}_2\text{O}$  and 2.85 g of  $\text{Cu}(\text{NO}_3)_2 \cdot 3\text{H}_2\text{O}$  were dissolved in 50 mL of anhydrous ethanol. Subsequently, 1.35 g of anhydrous oxalic acid was dissolved in 30 mL of anhydrous ethanol. After that, the solutions were mixed and stirred vigorously at room temperature for 0.5 h and then aged for 2 h. The suspension was centrifuged three times at 5000 r/min, washed with anhydrous ethanol, and dried at 100 °C for 12 h. Finally, the dried material was calcined at 450 °C for 3 h to yield the  $\text{ZrO}_2\text{-}0.25/\text{Cu}$  catalyst.

### ***Catalyst characterization***

X-Ray Diffraction (XRD) pattern of the catalyst was performed on the Rigaku SmartLab SE diffractometer (Japan) at 35 kV and 25 mA at a scanning rate of  $5^\circ \text{ min}^{-1}$ . The surface structure was observed by Transmission Electron Microscope (TEM) on the JEOL JEM-F200 machine (Japan). Actual metal content of Zr and Cu was determined by the Inductively Coupled Plasma Optical Emission Spectrometry (ICP-

OES) on Thermo Fisher iCAP PRO (America) instrument. BET surface area was obtained on the Micromeritics ASAP 2460 machine (America).

Temperature-programmed desorption (TPD) experiment was performed on the TP-5850- $\alpha$  instrument (China) with a thermal conductivity detector (TCD). For the catalysts, three pre-treatment conditions were investigated. For the fresh  $\text{ZrO}_2\text{-0.25/Cu}$  without other pre-treatment condition, the sample was abbreviated as  $\text{ZrO}_2\text{-0.25/Cu}$ -dried. For the fresh  $\text{ZrO}_2\text{-0.25/Cu}$  under  $\text{H}_2\text{O}$ -bubbling atmosphere ( $\text{H}_2\text{O}$  bubbling in He flow (30 mL/min) for 30 min), the sample was labelled as  $\text{ZrO}_2\text{-0.25/Cu}$ -humidified. For the fresh  $\text{ZrO}_2\text{-0.25/Cu}$  after reduced ( $\text{H}_2/\text{He}$  mixed gas (5 vol%  $\text{H}_2$ )) for 30 min, 300 °C), the sample was named as  $\text{ZrO}_2\text{-0.25/Cu}$ -reduced. 50 mg catalyst ( $\text{ZrO}_2\text{-0.25/Cu}$ -dried,  $\text{ZrO}_2\text{-0.25/Cu}$ -humidified, or  $\text{ZrO}_2\text{-0.25/Cu}$ -reduced) was heated under He atmosphere (30 mL/min) to 800 °C at a ramping rate of 5 °C/min, and the signal was recorded by TCD.

*In situ* DRIFTS experiments were conducted on a Bruker INVENIO R spectrometer. Similarly, the catalysts were pre-treated under identical conditions in the TPD experiment mentioned above ( $\text{ZrO}_2\text{-0.25/Cu}$ -dried,  $\text{ZrO}_2\text{-0.25/Cu}$ -humidified, or  $\text{ZrO}_2\text{-0.25/Cu}$ -reduced). Firstly, the catalyst was loaded into the chamber with a diamond coated with ZnSe window and was flushed with He gas (30 mL/min) for 30 min, which was connected to a homemade device pumped down to  $1 \times 10^{-5}$  Pa by an SH-110 Dry Scroll Vacuum pump (Agilent technologies) at 25 °C to collect background. Secondly, the methanol was introduced into the system by the natural negative pressure until the pressure reaching  $1.8 \times 10^{-5}$  Pa. Thirdly, the system was evacuated to  $1 \times 10^{-5}$  Pa

to remove physically adsorbed methanol. Finally, the system was heated from 25 °C to 250 °C at the interval of 25 °C to collect the corresponding spectrum.

### ***Catalyst evaluation***

The MSR reaction was carried out on a fixed-bed reactor (Fig. S1). 200 mg ZrO<sub>2</sub>-x/Cu catalyst was placed into the reactor with an inner diameter of 9 mm and length of 450 mm. Initially, the catalyst was reduced with H<sub>2</sub>/N<sub>2</sub> mixed gas (5 vol% H<sub>2</sub>, 30 mL/min) at 300 °C for 2 h. Subsequently, the atmosphere was switched to pure N<sub>2</sub> at a flow rate of 30 mL/min, and the temperature was adjusted to required temperature. Methanol and H<sub>2</sub>O mixed solution (molar ratio of 1:1) was introduced into the reactor by a peristaltic pump at a flow rate of 2 g/h. The effluent was analyzed by a gas chromatograph (GC9890B, Linghua Company).

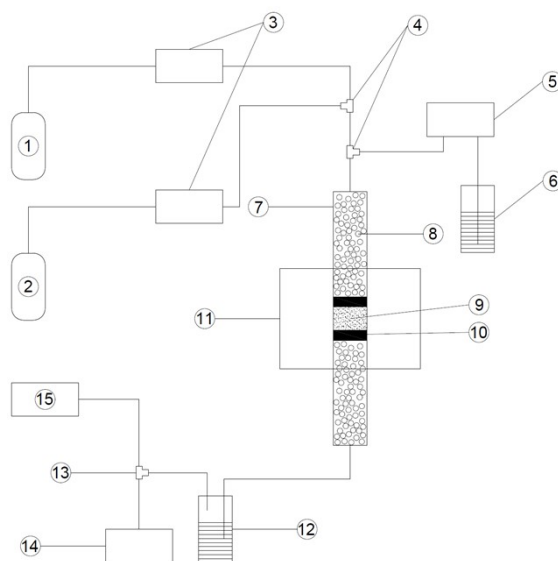

**Fig. S1.** Gas - solid phase catalyst evaluation reaction apparatus.

1. A 5% H<sub>2</sub>/N<sub>2</sub> gas cylinder with an output pressure of 0.3 MPa.
2. A N<sub>2</sub> gas cylinder with an output pressure of 0.3 MPa.
3. Mass flow meters with an output pressure of 1 atmosphere and a measuring range of 100 mL/min each.
4. A three-way connector for connecting the gas circuit.
5. A metering pump (Oushisheng, DPS - 10).
6. A 50 wt.% methanol - water solution.
7. A quartz tube with an outer diameter of 25 mm and an inner diameter of 9 mm.
8. Quartz sand, with the mesh number gradually increasing from both ends to the center of the tube, varying from 16 mesh to 70 mesh.
9. Catalysts.
10. Quartz wool, 4 - 6  $\mu$ m.
11. A heating furnace with a constant - temperature zone of 200 mm.
12. A sealed 30 - mL sample bottle, sealed with a rubber stopper, containing deionized water for absorbing the reaction methanol.
13. A three - way ball valve for switching the gas circuit.
14. Atmospheric environment.
15. A soap - film flowmeter for analyzing gas flow rate.

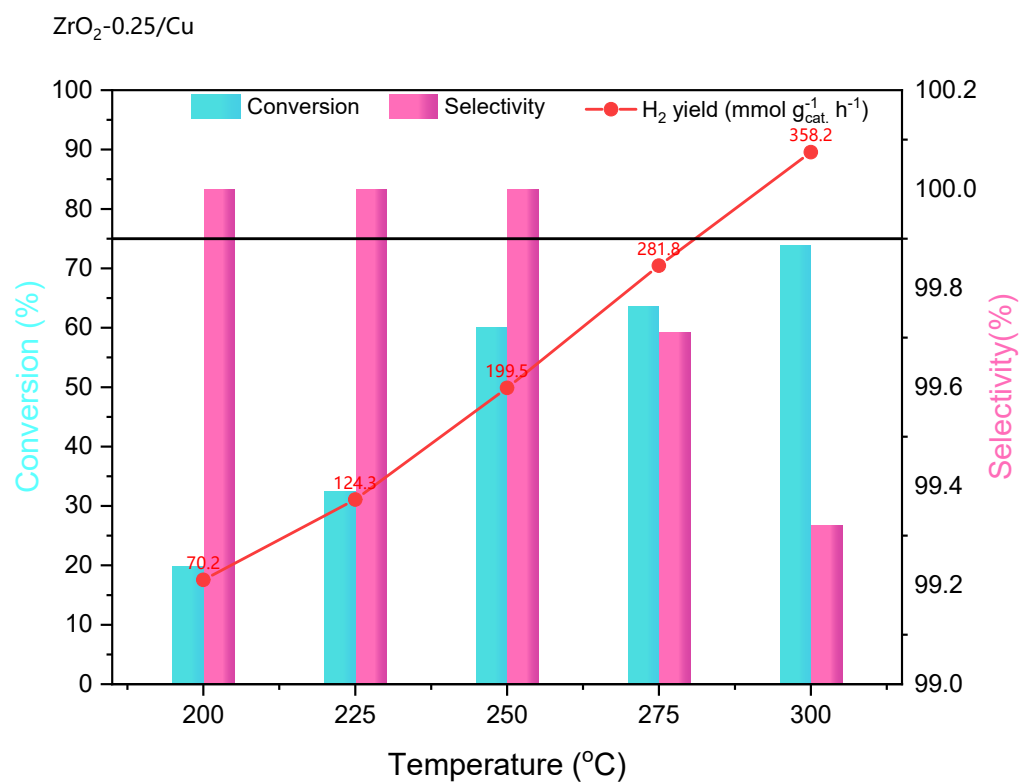

**Fig. S2.** Catalytic performance of ZrO<sub>2</sub>-0.25/Cu.



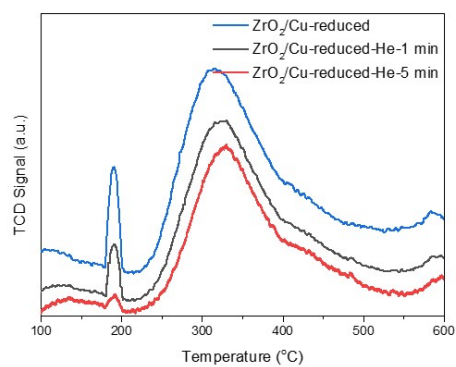

**Fig. S4.** H<sub>2</sub>O-TPD spectra of ZrO<sub>2</sub>/Cu-reduced, ZrO<sub>2</sub>/Cu-reduced-He-1 min (ZrO<sub>2</sub>/Cu-reduced treated under He flow for 1 min at 180 °C), and ZrO<sub>2</sub>/Cu-reduced-He-5 min (ZrO<sub>2</sub>/Cu-reduced treated under He flow for 5 min at 180 °C).



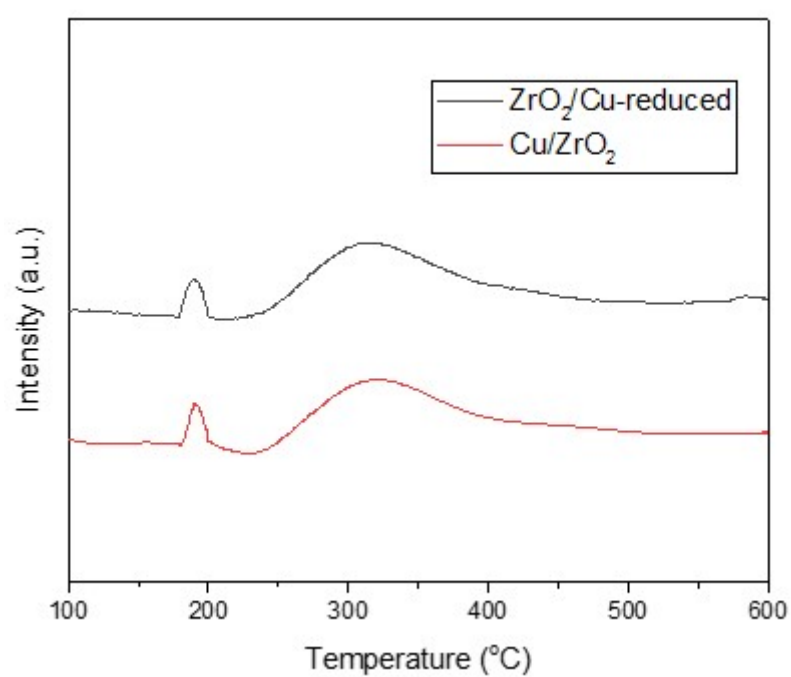

**Fig. S5.** H<sub>2</sub>O-TPD spectra of ZrO<sub>2</sub>/Cu-reduced, and traditional Cu/ZrO<sub>2</sub>.

## Semi-quantitative peak deconvolution of OH

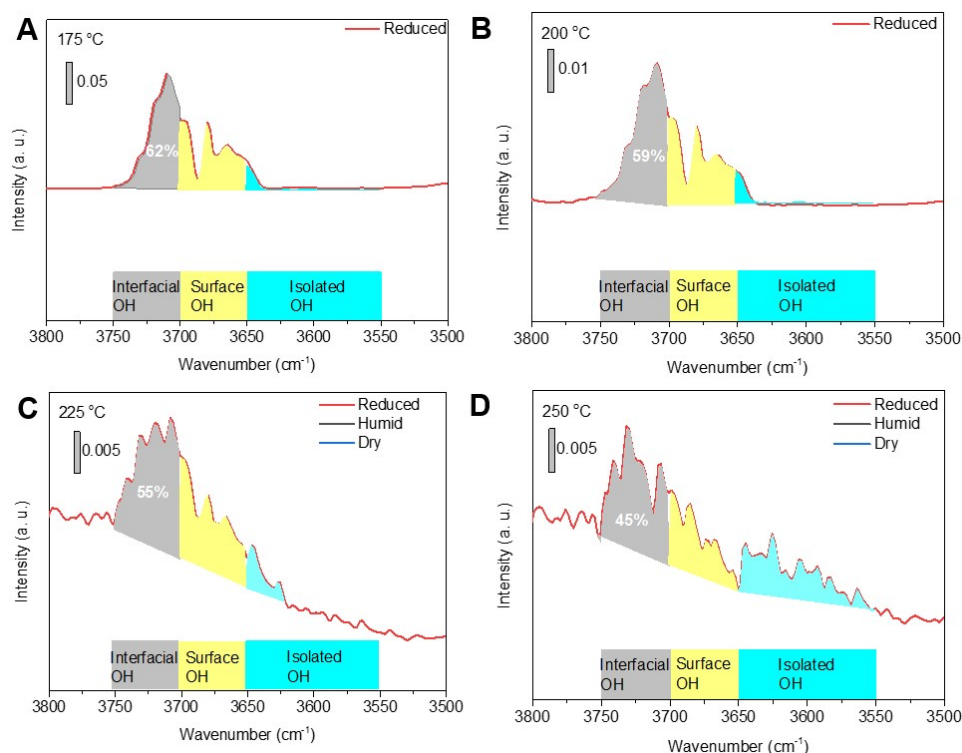

**Fig. S6.** Amplified *in situ* DRIFTS (3800-3500 cm<sup>-1</sup>, to differentiate surface OH from interfacial OH) of ZrO<sub>2</sub>/Cu-reduced, ZrO<sub>2</sub>/Cu-humidified, and ZrO<sub>2</sub>/Cu-dried after methanol reaction for 3 min at different temperatures.

To better understand the critical role of interfacial OH playing in the MSR reaction, we have deconvoluted the OH peaks. For the ZrO<sub>2</sub>/Cu-humid and ZrO<sub>2</sub>/Cu-dry, the OH contents are very low, so, we only calculate the interfacial OH content for ZrO<sub>2</sub>/Cu-reduced for accuracy.

For ZrO<sub>2</sub>/Cu-reduced with abundant OH, with the increase of reaction temperature (175-250 °C), we could find that the peak area of OH decreases obviously, which is caused by the depletion of OH. Moreover, with the increase of reaction temperature, the ratio of interfacial OH decreases (from 62% to 45%), corresponding with the reaction of interfacial OH with methanol and the transformation between interfacial OH and surface/isolated OH.

**Table S1.** Structure information of ZrO<sub>2</sub>-0.25/Cu catalyst.

| Catalyst                  | ZrO <sub>2</sub> loading <sup>a</sup><br>(wt.%) | Crystalline size<br>(nm) <sup>b</sup> |                    |         |                    |
|---------------------------|-------------------------------------------------|---------------------------------------|--------------------|---------|--------------------|
|                           |                                                 | Fresh                                 |                    | Reduced |                    |
|                           |                                                 | CuO                                   | t-ZrO <sub>2</sub> | Cu      | t-ZrO <sub>2</sub> |
| ZrO <sub>2</sub> -0.25/Cu | 22.01                                           | 10-15                                 | 3-4                | 15-20   | 3-4                |

<sup>a</sup>Determined by ICP-OES.<sup>b</sup>Derived from TEM.

**Table S2.** Catalytic performance of ZrO<sub>2</sub>-x/Cu.

| Catalyst                  | Temperature (°C) | Conversion* (%) | Selectivity* (%) | H <sub>2</sub> yield* (mmol g <sub>cat.</sub> <sup>-1</sup> h <sup>-1</sup> ) |
|---------------------------|------------------|-----------------|------------------|-------------------------------------------------------------------------------|
| ZrO <sub>2</sub> -0.05/Cu | 200              | 8.7             | 100              | 52.6                                                                          |
|                           | 225              | 24.8            | 100              | 105.2                                                                         |
|                           | 250              | 37.5            | 100              | 164.8                                                                         |
|                           | 275              | 50.0            | 99.6             | 264.1                                                                         |
|                           | 300              | 67.6            | 99.3             | 336.3                                                                         |
| ZrO <sub>2</sub> -0.25/Cu | 200              | 19.9            | 100              | 70.2                                                                          |
|                           | 225              | 32.4            | 100              | 124.3                                                                         |
|                           | 250              | 60.0            | 100              | 199.5                                                                         |
|                           | 275              | 63.6            | 99.7             | 281.8                                                                         |
|                           | 300              | 73.8            | 99.3             | 358.2                                                                         |
| ZrO <sub>2</sub> -0.5/Cu  | 200              | 11.3            | 100              | 50.3                                                                          |
|                           | 225              | 23.7            | 100              | 155                                                                           |
|                           | 250              | 37.6            | 100              | 162.5                                                                         |
|                           | 275              | 48.2            | 99.7             | 241                                                                           |
|                           | 300              | 62.5            | 99.4             | 281.1                                                                         |

\*Pretreatment was conducted at 300 °C utilizing a reducing atmosphere comprising 5% H<sub>2</sub> in N<sub>2</sub> at a constant flow rate of 30 mL/min over a duration of 2 hours. Thereafter, the catalytic activities of various catalysts were evaluated at distinct reaction temperatures, employing a space-time velocity of 10 h<sup>-1</sup>, a catalyst mass of 200 mg, and an N<sub>2</sub> flow rate maintained at 30 mL/min.
